# Supplementary material for: Use of Portable Devices and an Innovative and Non-Destructive Index for In-Field Monitoring of Olive Fruit Ripeness
Source: MDPI journal article supplement (doi:10.3390/agriculture13010194), 2023-01-12
Supplement: s1 [file s1]

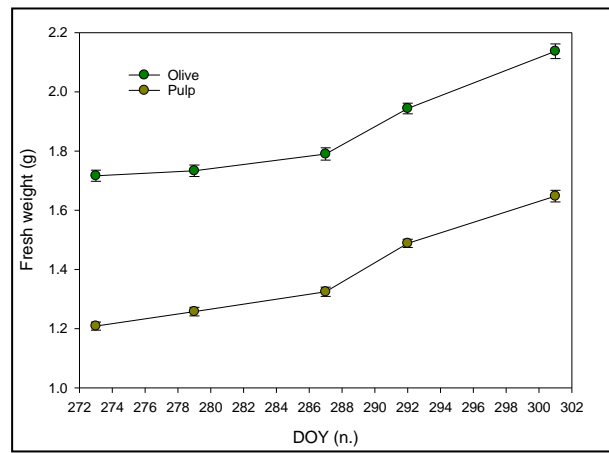

Figure S1: Variations of fruit and pulp fresh weight during sampling (each point represents mean value of 200 fruits  $\pm$  s.e).

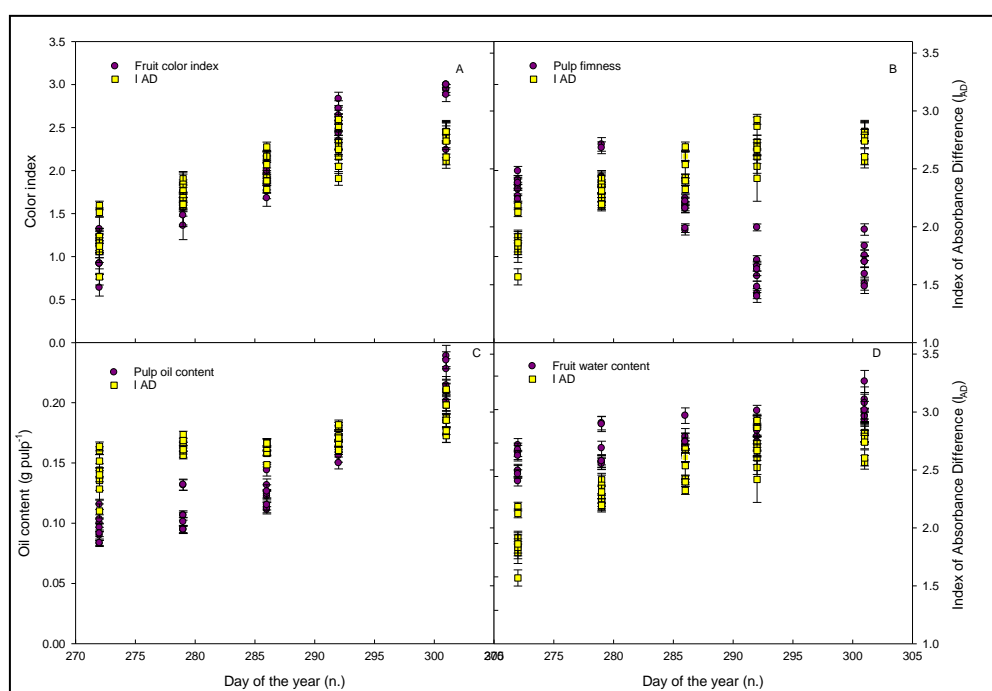

Figure S2: Variations of  $I_{AD}$  and of the ripening indexes along the ripening stages of olive, detected with Kiwi-Meter<sup>®</sup> device (each point represents mean value of 50 fruits tree<sup>-1</sup>  $\pm$  s.e.).

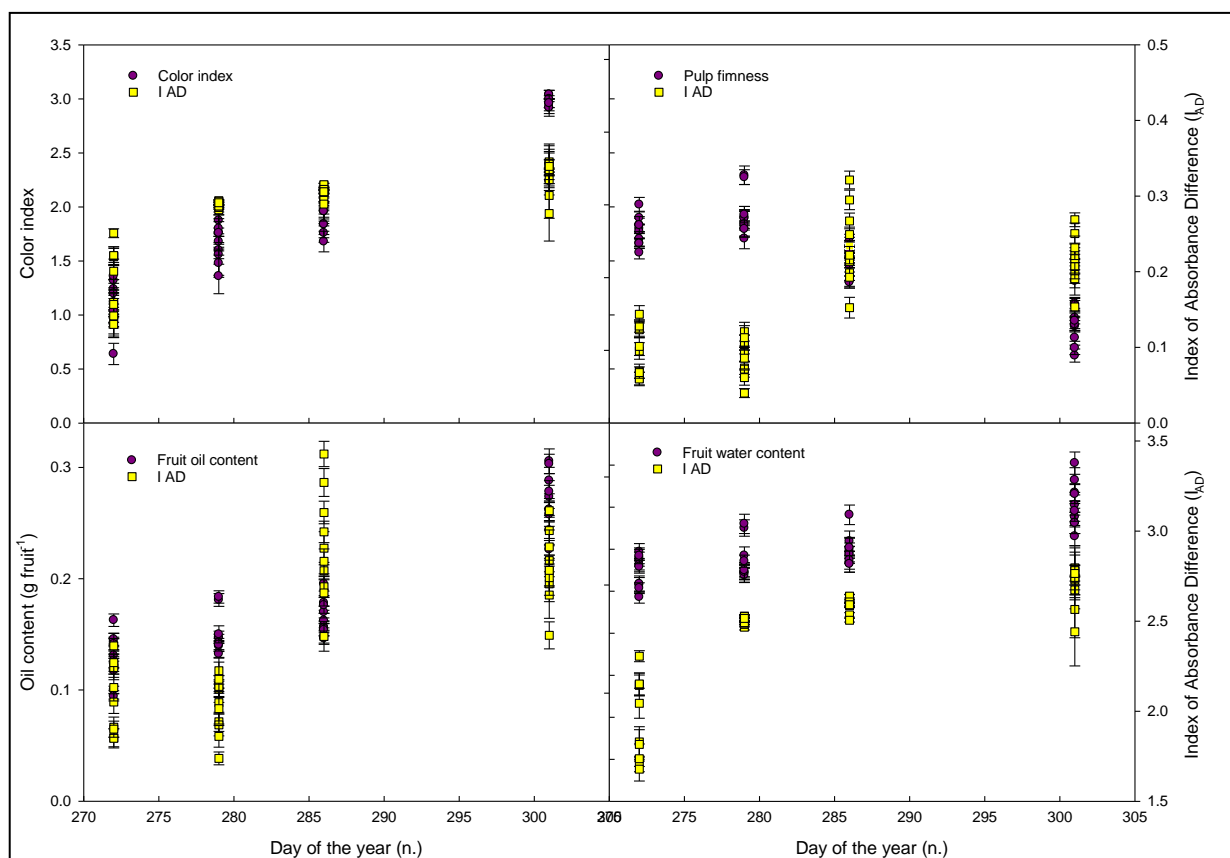

Figure S3: Variations of  $I_{AD}$  and of the ripening indexes along the ripening stages of olive, detected with Standard DA-Meter ® (each point represents mean value of 50 fruits tree<sup>-1</sup> ± s.e.).
